# Supplementary material for: Progesterone promotes maternal–fetal tolerance by reducing human maternal T‐cell polyfunctionality and inducing a specific cytokine profile
Source: PubMed Central journal article supplement (PMC4833190; doi:10.1002/eji.201445404), 2015-08-28
Supplement: EJI-45-2858-s001.pdf [file EJI-45-2858-s001.pdf]

# European Journal of Immunology

Supporting Information  
for

**DOI 10.1002/eji.201445404**

David Lissauer, Suzy A. Eldershaw, Charlotte F. Inman, Aravinthan Coomarasamy,  
Paul A. H. Moss and Mark D. Kilby

**Progesterone promotes maternal–fetal tolerance  
by reducing human maternal T-cell polyfunctionality  
and inducing a specific cytokine profile**

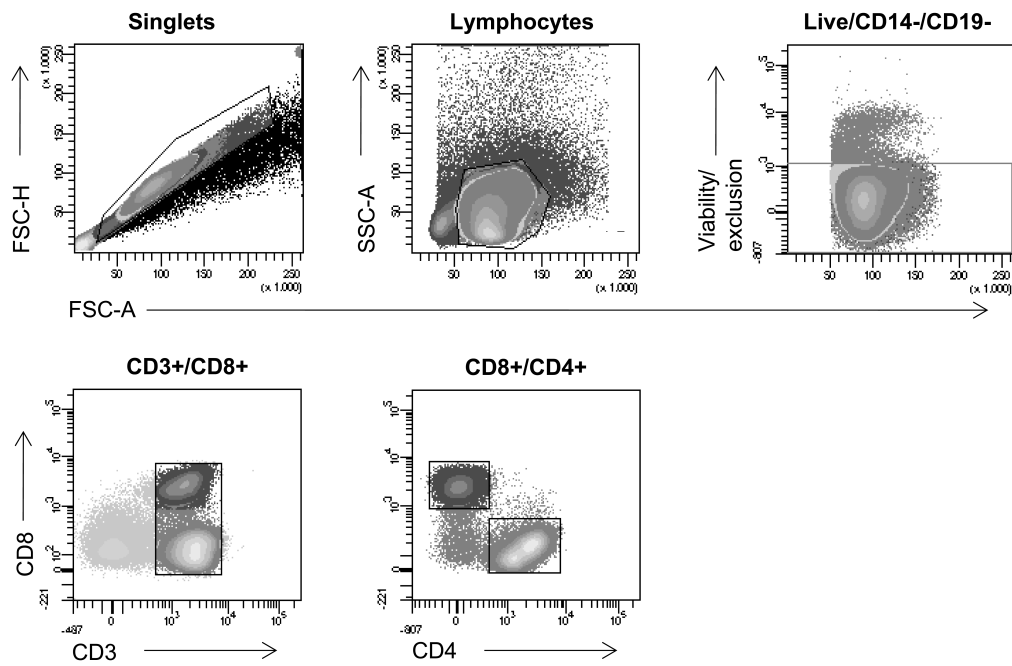

**Supporting information Figure 1.** Flowcytometry gating strategy. FSC-H and FSC-A were used to identify singlets. Lymphocytes are then gated using FSC-A versus SSC-A. Dead cells, CD14+ and CD19+ cells are excluded using viability/exclusion channel before CD3+ cells are selected and then CD4+ and CD8+ cells are gated to look at cytokine expression.

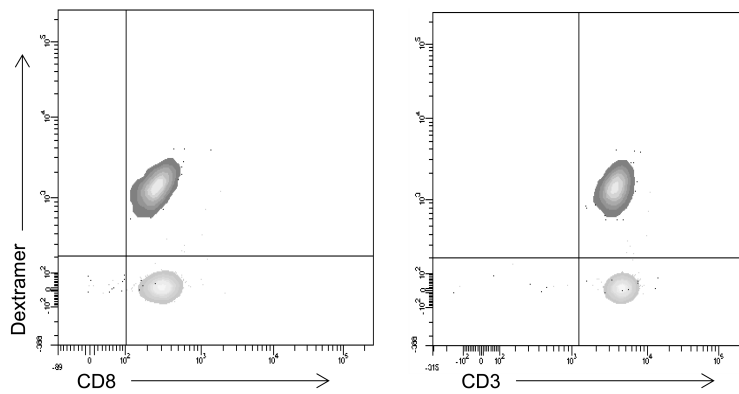

**Supporting information Figure 2.** Antigen specificity of CD8+ T cell clones.

Flow cytometry plots illustrate the antigen specificity of CD8+ T cell clones, using MHC-peptide dextramer specific for HY antigen (HLA\*0201 FIDSYICQV PE, shown in black) compared to negative dextramer (HLA\*0201 neg PE, shown in grey).

| LSRII configuration | Laser  | Filter           | Antibody                      | Clone    | Conjugate   |
|---------------------|--------|------------------|-------------------------------|----------|-------------|
| Surface stain       | 488    | 610/20           | Viability Dye <sup>a</sup>    |          |             |
|                     |        |                  | CD14 <sup>b</sup>             | RMO52    | ECD         |
|                     |        |                  | CD19 <sup>b</sup>             | J3-119   | ECD         |
|                     |        | 695/40           | CD4 <sup>c</sup>              | RPA-T4   | PerCP-Cy5.5 |
|                     | 405    | 525/50           | CD8 <sup>d</sup>              | RPA-T8   | V500        |
| 633                 | 780/60 | CD3 <sup>e</sup> | HIT3a                         | APC-Cy7  |             |
| Intracellular stain | 488    | 530/30           | IL5 <sup>f</sup>              | 9906     | FITC        |
|                     |        | 575/26           | IL10 <sup>c</sup>             | JES3-9D7 | PE          |
|                     |        | 780/60           | TNF $\alpha$ <sup>c</sup>     | Mab11    | PE-Cy7      |
|                     | 405    | 450/50           | IL17 <sup>e</sup>             | BL168    | PB          |
|                     | 633    | 660/20           | IL4 <sup>e</sup>              | 8D4-8    | APC         |
|                     |        | 730/45           | IFN $\gamma$ <sup>e</sup>     | 4S.B3    | AF700       |
| Clone specificity   | 488    | 575/26           | Dextramer <sup>g</sup>        |          | PE          |
|                     |        | 610/620          | Viability Dye <sup>a</sup>    |          |             |
|                     | 405    | 525/50           | CD8 <sup>d</sup>              | RPA-T8   | V500        |
|                     | 633    | 780/60           | CD3 <sup>e</sup>              | HIT3a    | APC-Cy7     |
| Proliferation       | 405    | 450/50           | CellTrace Violet <sup>a</sup> |          |             |

**Supporting information Table I.** LSR II configurations and reagents used

a=Lifetechnologies, b=Beckman Coulter, c= Ebiosciences, d= BD biosciences, e=

Biolegend, f= R&D systems, g= Immunodex
